# Supplementary material
Source: publisher site journal article supplement (https://www.spandidos-publications.com/2348/downloadSupplementary)

Figure S1. Validation of miR-576-3p knockdown or overexpression efficiency in ovarian cancer cells and DDP-resistant ovarian cancer cells. (A) The expression levels of miR-576-3p were measured in SKOV3 and A2780 cells transfected with miR-576-3p mimic or its NC for 24 h. (B) The expression levels of miR-576-3p were detected in SKOV3/DDP and A2780/DDP cells transfected with miR-576-3p inhibitor or NC inhibitor for 24 h. n=3. \*\*\*P<0.001. miRNA, microRNA; DDP, cisplatin; NC, negative control.

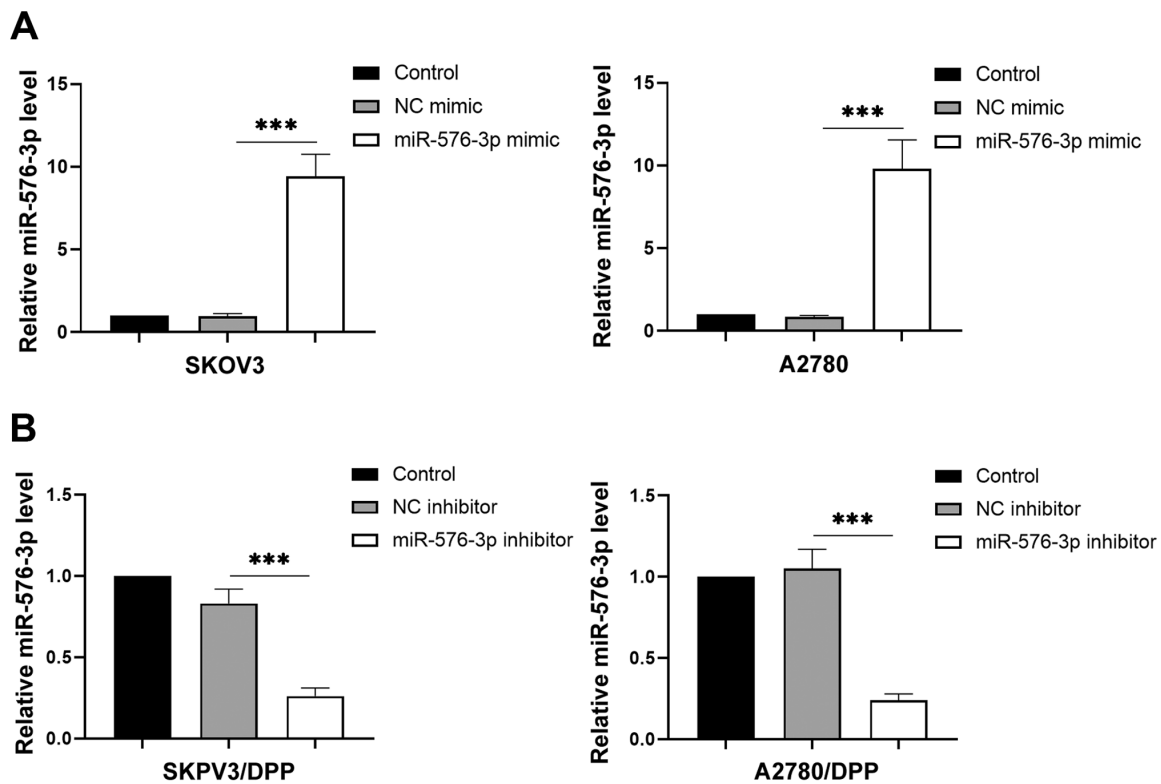

Figure S2. miR-576-3p overexpression inhibits cell proliferation and promotes apoptosis in ovarian cancer cells. (A) Cell viability was measured by an MTT assay in A2780 cells following transfection with miR-576-3p mimic or its NC for 24 h. Analysis of (B) cell cycle and (C) apoptosis using flow cytometry in A2780 cells following transfection with miR-576-3p mimic or its NC. n=3. \*\*P<0.01 and \*\*\*P<0.001. miRNA, microRNA; DDP, cisplatin; NC, negative control.

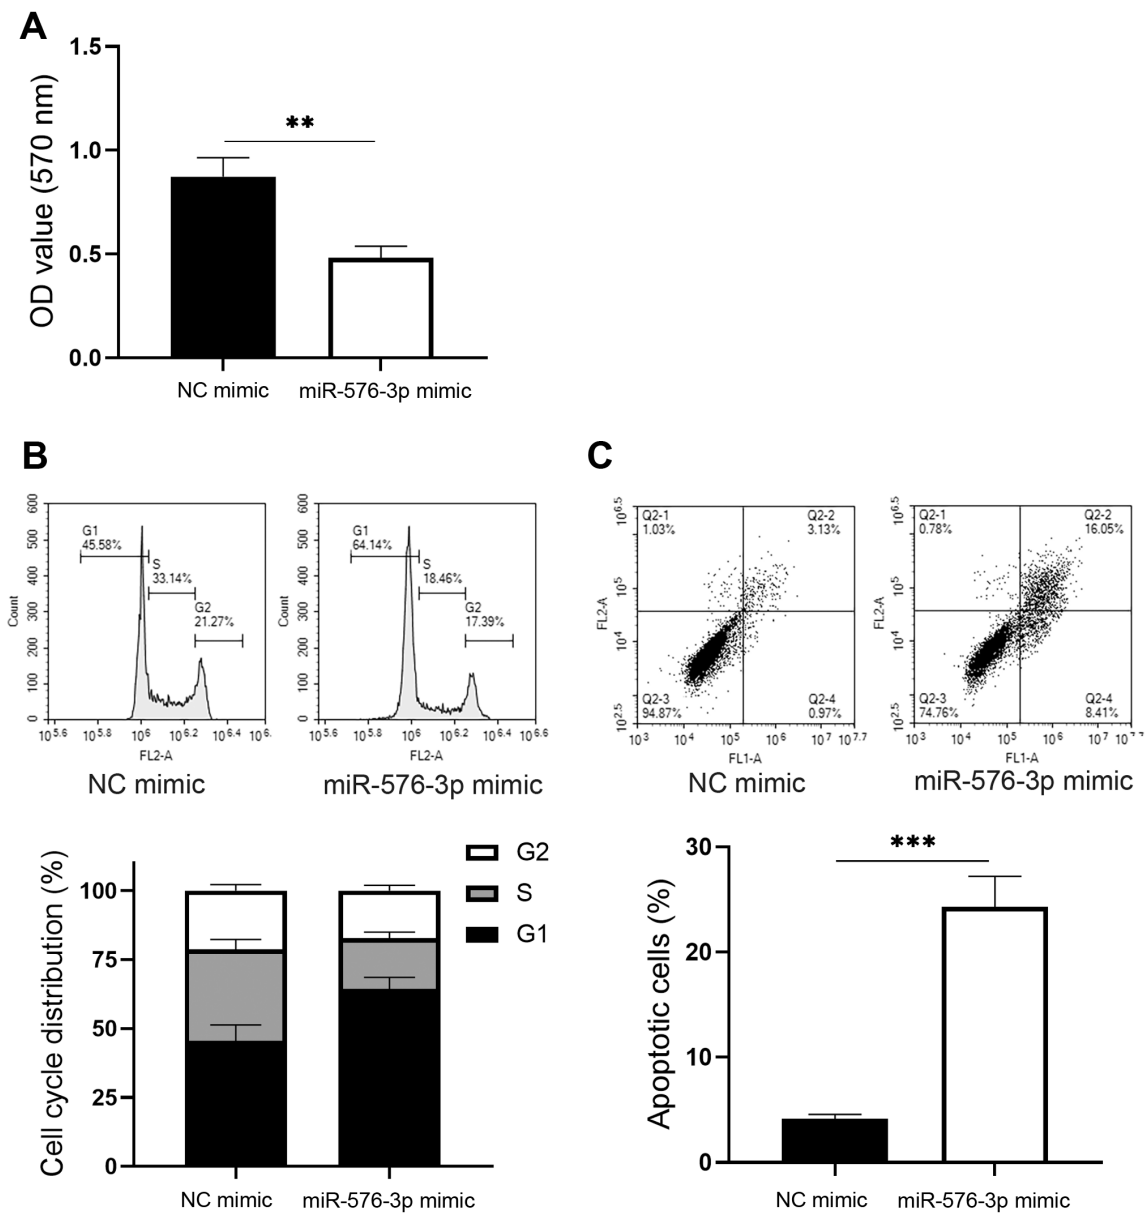

Supplement: Supplementary file 1 [file downloadSupplementary]
